# Supplementary material for: LIonomers-New Generation of Ionomer: Understanding of Their Interaction and Structuration as a Function of the Tunability of Cation and Anion
Source: MDPI journal article supplement (doi:10.3390/polym15020370), 2023-01-10
Supplement: s1 [file s1]

## 1. Elemental Analysis Spectra (EDX-TEM)

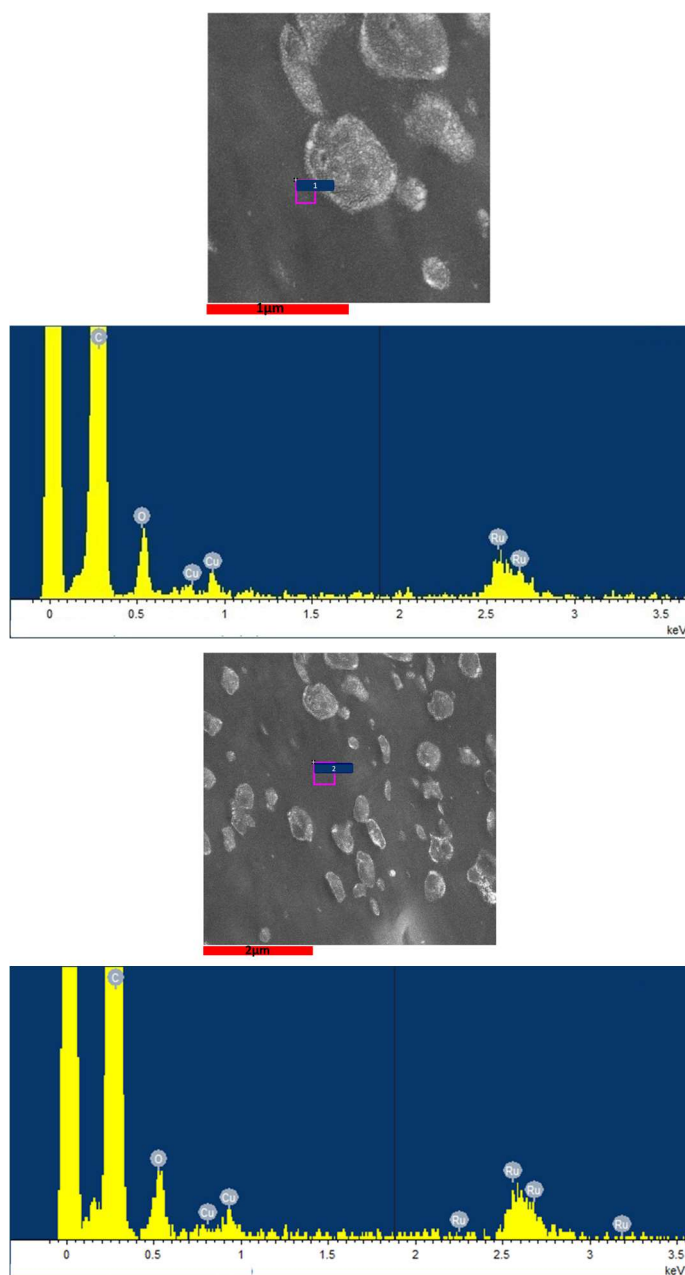

Polymer  
matrix within  
L-P\*DEP-10

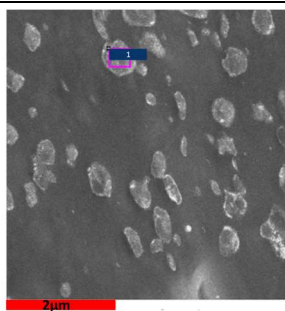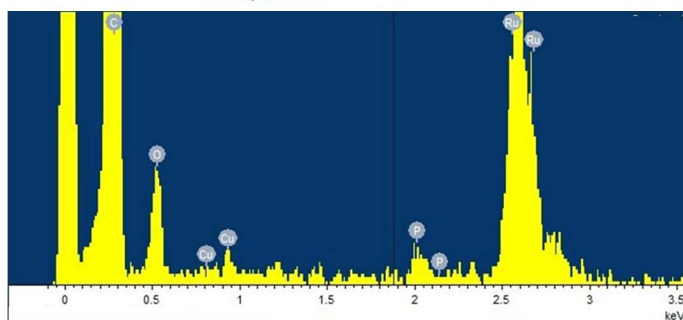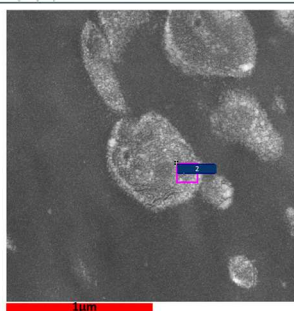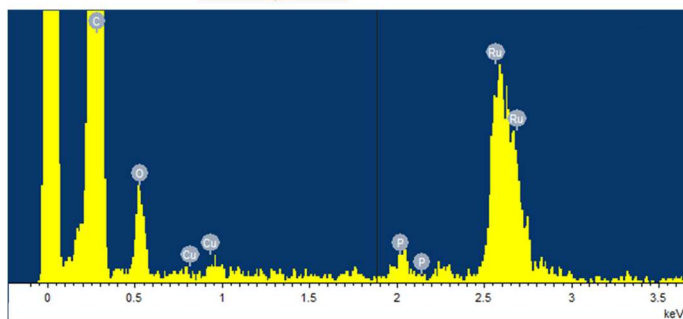

L-P\*DEP-10

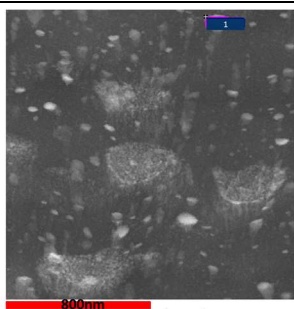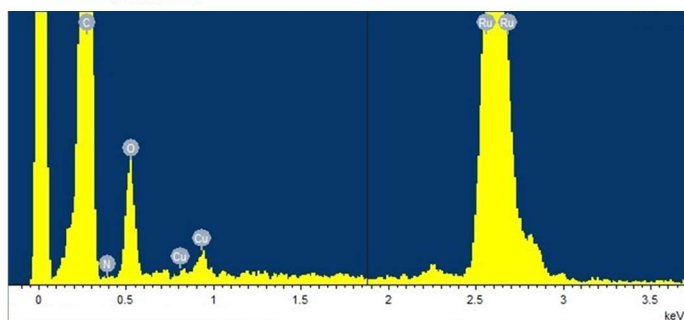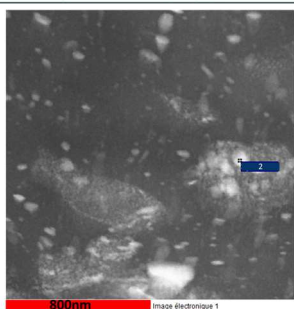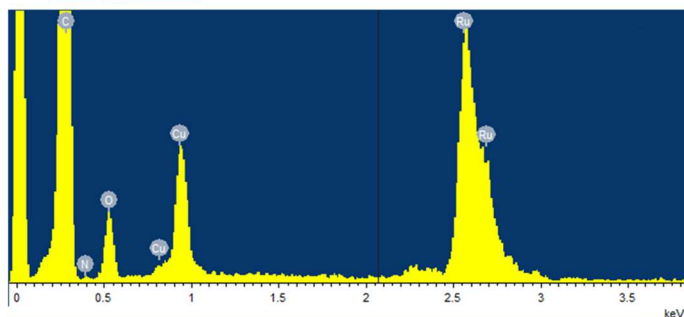

L-EMIM Ac-10

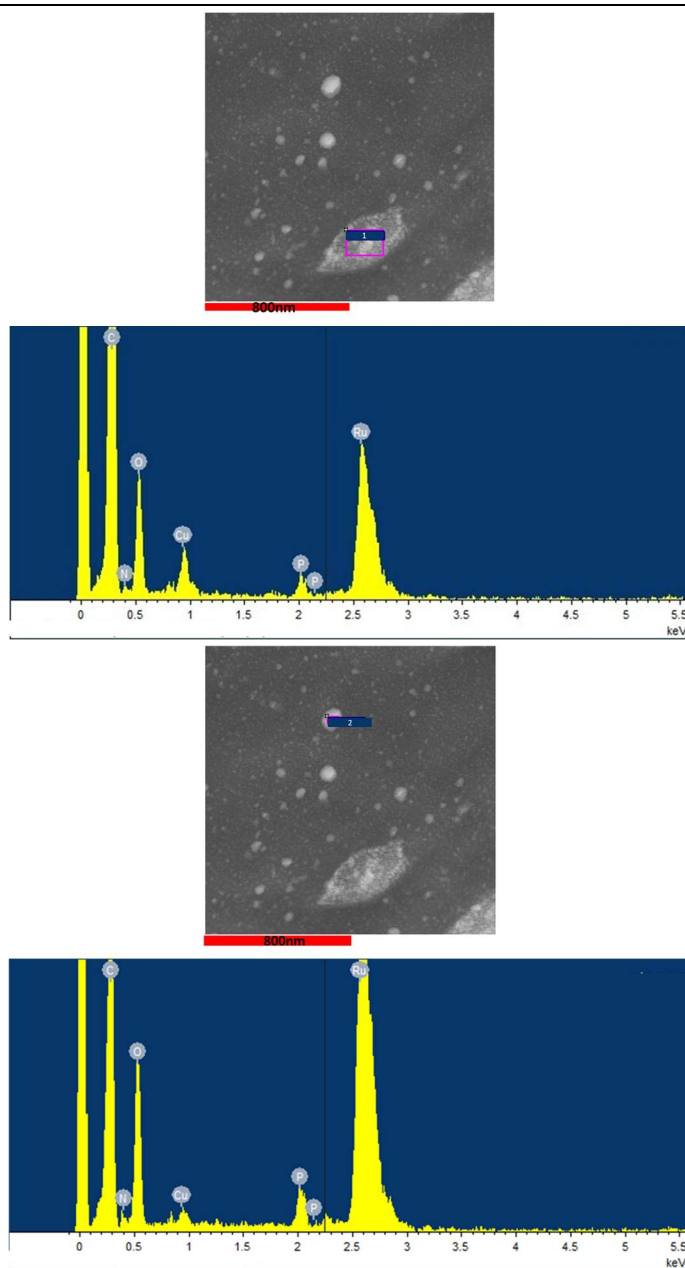

L-EMIM DEP-  
10

**Figure S1.** Elemental analysis spectra (EDX) of Llonomers performed on fractured surfaces observed by TEM.

## 2. DSC thermograms of PPgMA and related Llonomers

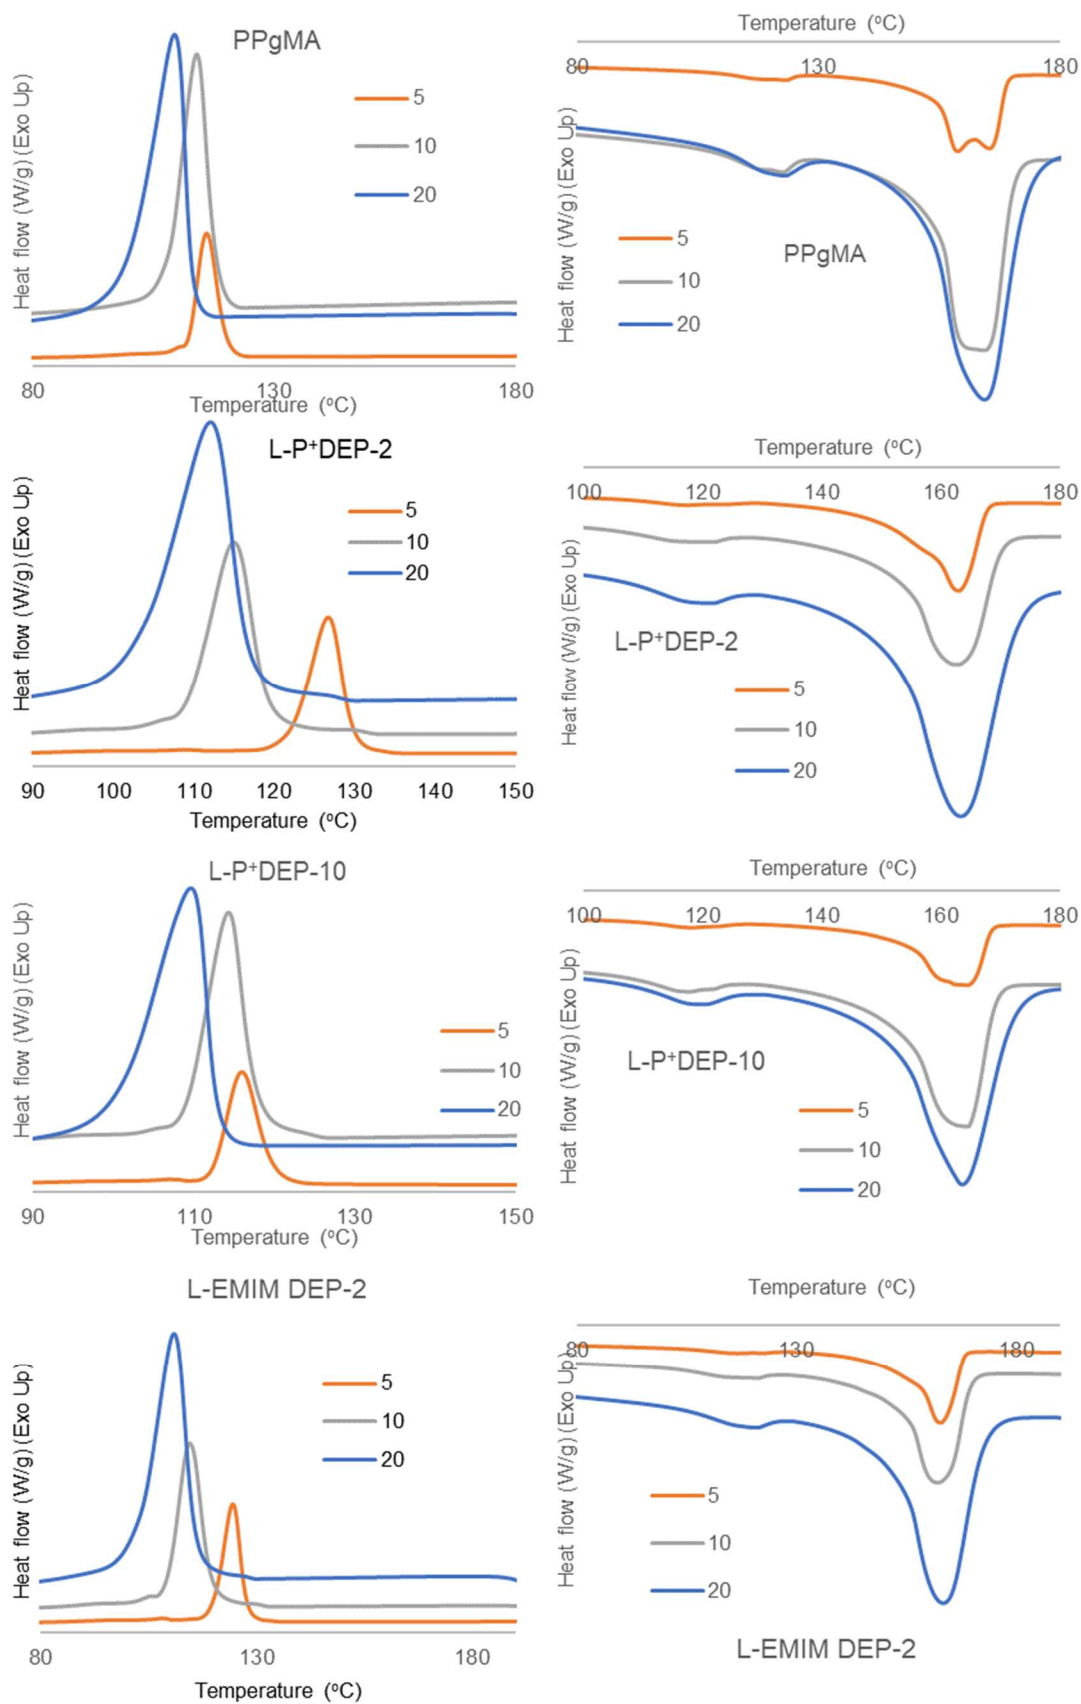

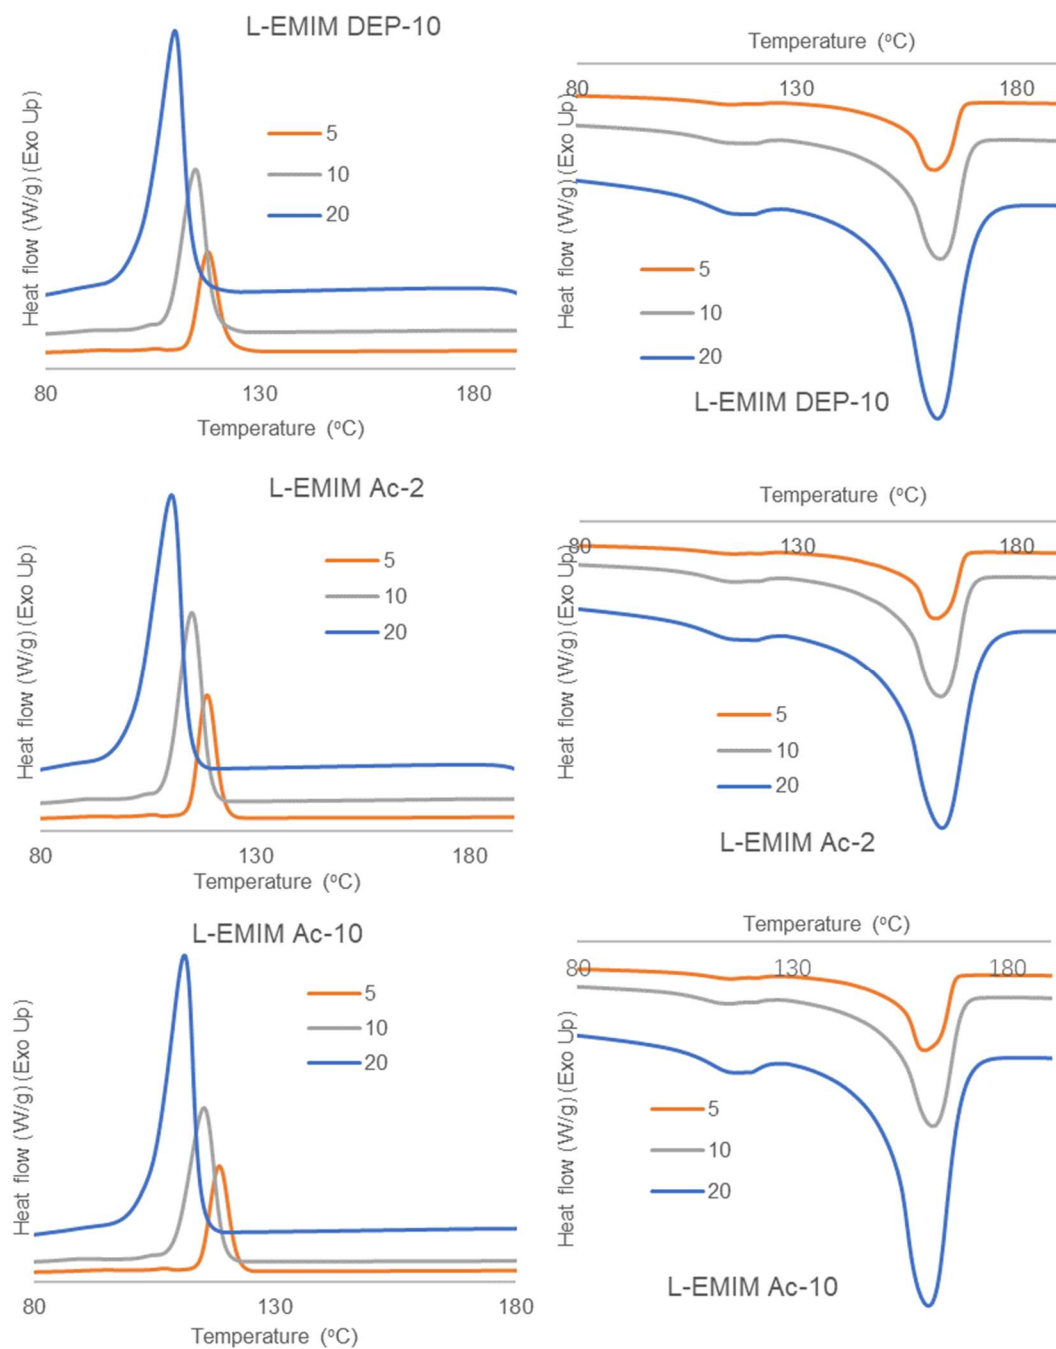

**Figure S2.** DSC traces of PPgMA and related Llonomers prepared with various ionic liquids (2 and 10 wt.%). Melting and crystallization phenomenon was observed for different heating and cooling rates (5, 10, and 20 K·min<sup>-1</sup>) under nitrogen atmosphere.

### 3. $\ln[-\ln(1-X_t)]$ vs. $\ln t$ plots according to Jeziorny's non-isothermal crystallization model

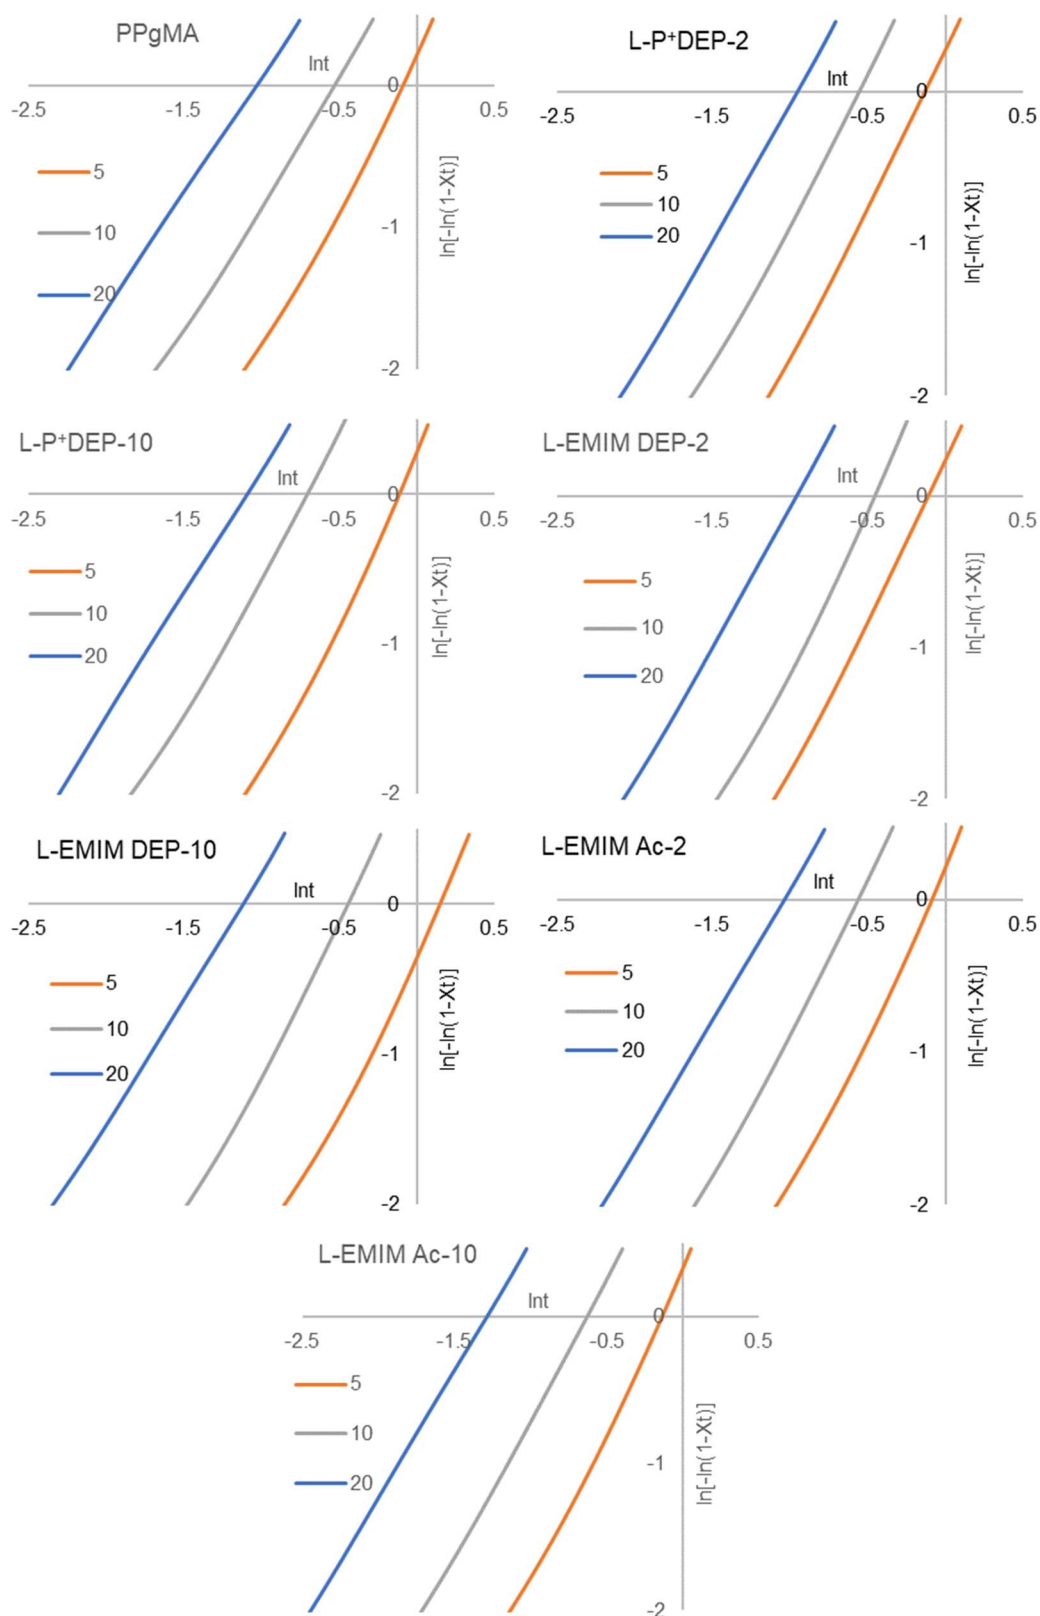

**Figure S3.**  $\ln[-\ln(1-X_t)]$  vs.  $\ln t$  plots according to Jeziorny's crystallization model for neat PPgMA and related L-ionomers based on various ionic liquids (2 and 10 wt.%) for different cooling rates (5, 10, and 20 K·min<sup>-1</sup>)

#### 4. Detailed parameters of non-isothermal crystallization process in accordance with Jeziorny's model

**Table S1.** Parameters of non-isothermal crystallization process based on Jeziorny's model.

| Samples       | $\Phi$ (K/min) | $t_{1/2}$ (min) | n    | $Z_t$ | $T_m$ (°C)  | $T_c$ (°C) | $X_c$ (%) |
|---------------|----------------|-----------------|------|-------|-------------|------------|-----------|
| PPgMA         | 5              | 0.77            | 2.01 | 1.17  | 159.0/165.6 | 116.1      | 34.1      |
|               | 10             | 0.47            | 1.78 | 2.68  | 164.2       | 114.1      | 35.5      |
|               | 20             | 0.28            | 1.65 | 5.55  | 164.5       | 109.5      | 31.6      |
| L-P+DEP-2     | 5              | 0.74            | 2.01 | 1.28  | 163.0       | 126.8      | 37.6      |
|               | 10             | 0.48            | 1.88 | 2.81  | 162.8       | 115.0      | 34.7      |
|               | 20             | 0.32            | 1.76 | 5.29  | 163.4       | 112.2      | 33.6      |
| L-P+DEP-10    | 5              | 0.76            | 2.06 | 1.22  | 164.5       | 116.0      | 35.1      |
|               | 10             | 0.41            | 1.81 | 3.54  | 164.7       | 114.3      | 34.0      |
|               | 20             | 0.27            | 1.65 | 6.16  | 163.7       | 109.6      | 32.1      |
| L-EMIM DEP-2  | 5              | 0.72            | 1.98 | 1.33  | 162.9       | 124.6      | 36.8      |
|               | 10             | 0.50            | 1.94 | 2.65  | 162.3       | 114.6      | 34.3      |
|               | 20             | 0.31            | 1.81 | 5.66  | 163.4       | 111.0      | 33.2      |
| L-EMIM DEP-10 | 5              | 0.87            | 2.04 | 0.92  | 161.6       | 118.0      | 35.3      |
|               | 10             | 0.49            | 1.85 | 2.56  | 162.9       | 115.1      | 34.0      |
|               | 20             | 0.28            | 1.69 | 5.98  | 162.2       | 110.2      | 33.4      |
| L-EMIM Ac-2   | 5              | 0.77            | 2.03 | 1.16  | 161.9       | 118.8      | 34.2      |
|               | 10             | 0.47            | 1.92 | 2.92  | 162.9       | 115.2      | 33.7      |
|               | 20             | 0.29            | 1.71 | 5.90  | 163.2       | 110.5      | 34.6      |
| L-EMIM Ac-10  | 5              | 0.72            | 2.30 | 0.84  | 161.0       | 118.5      | 36.9      |
|               | 10             | 0.44            | 1.86 | 3.20  | 162.8       | 115.3      | 35.8      |
|               | 20             | 0.22            | 1.73 | 9.35  | 161.7       | 111.2      | 35.0      |

Note:  $\Phi$ : cooling rate (K.min<sup>-1</sup>),  $T_m$ : melting temperature (°C),  $T_c$ : crystallization temperature (°C) and  $X_c$ : crystallinity (%).
